# Supplementary material for: DNA methylation of IFI44L as a potential blood biomarker for childhood-onset systemic lupus erythematosus
Source: PubMed Central journal article supplement (PMC11343705; doi:10.1038/s41390-024-03135-1), 2024-03-21

HC1

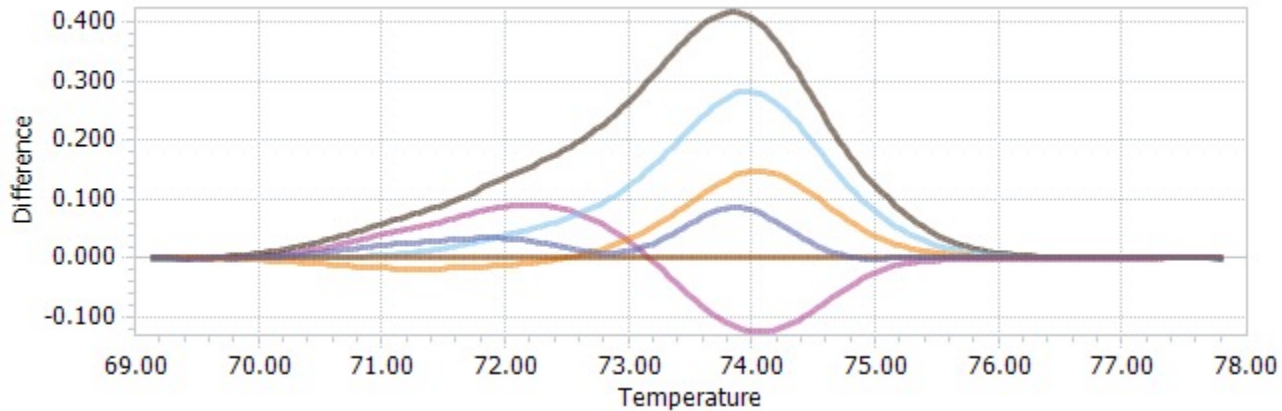

HC2

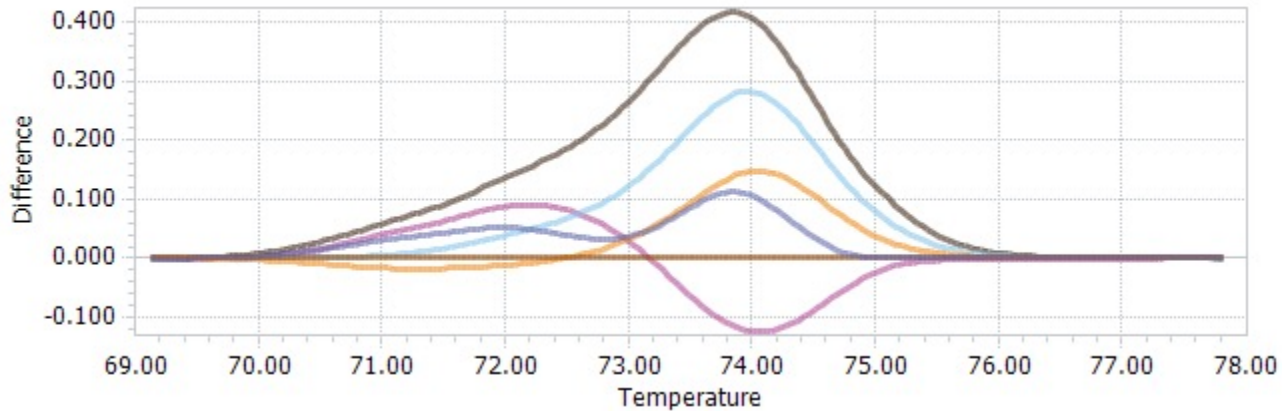

HC3

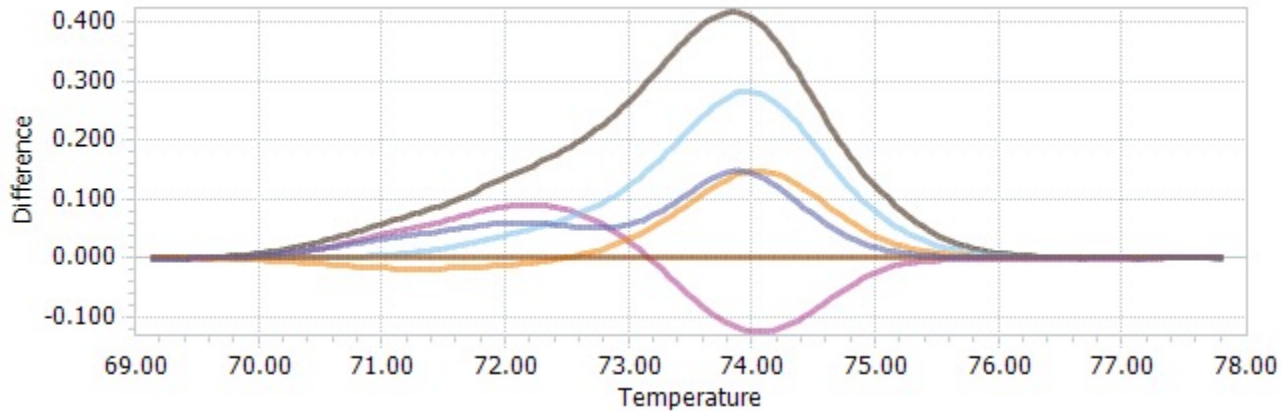

HC4

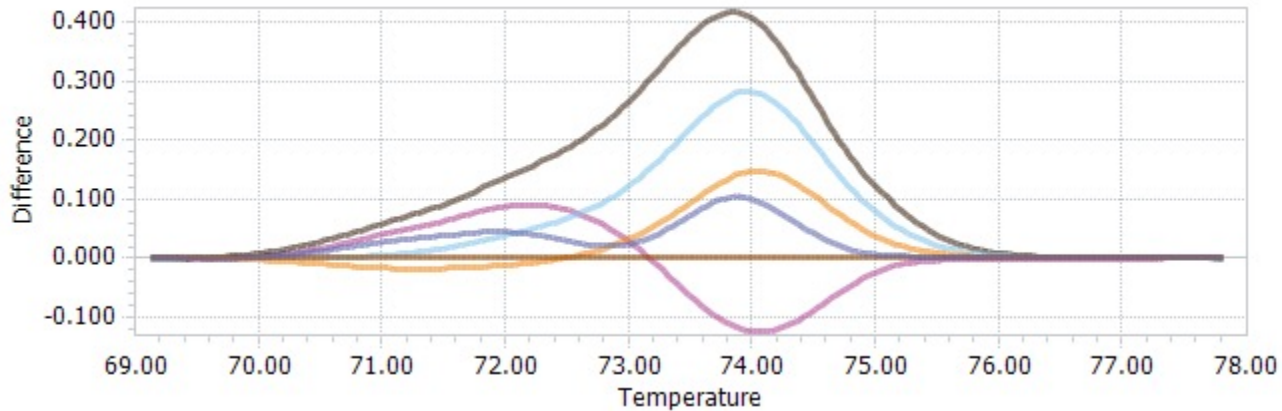

# HC5

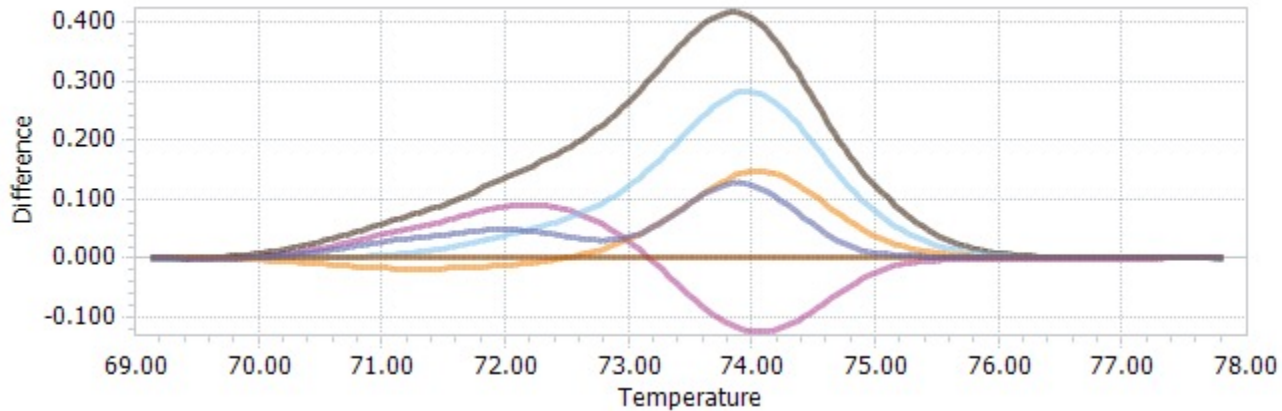

# HC6

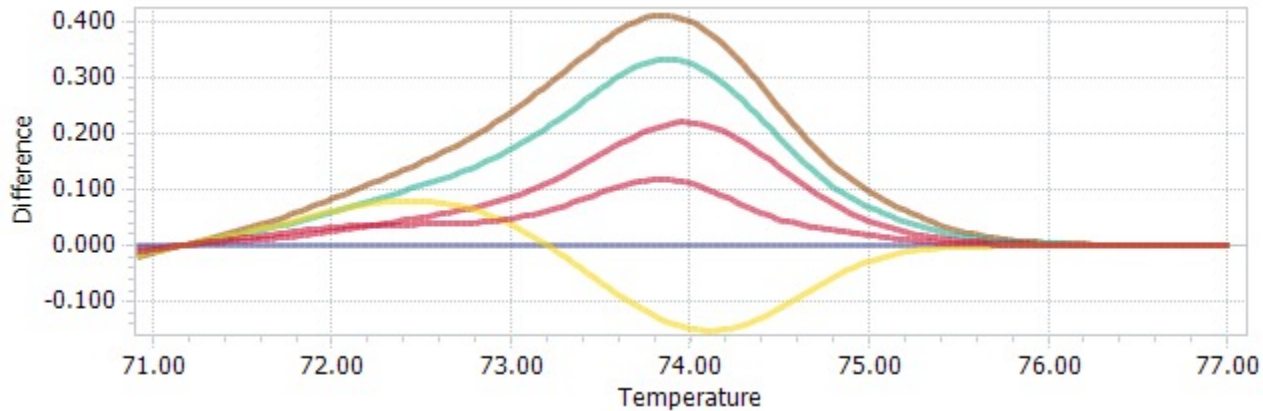

HC7

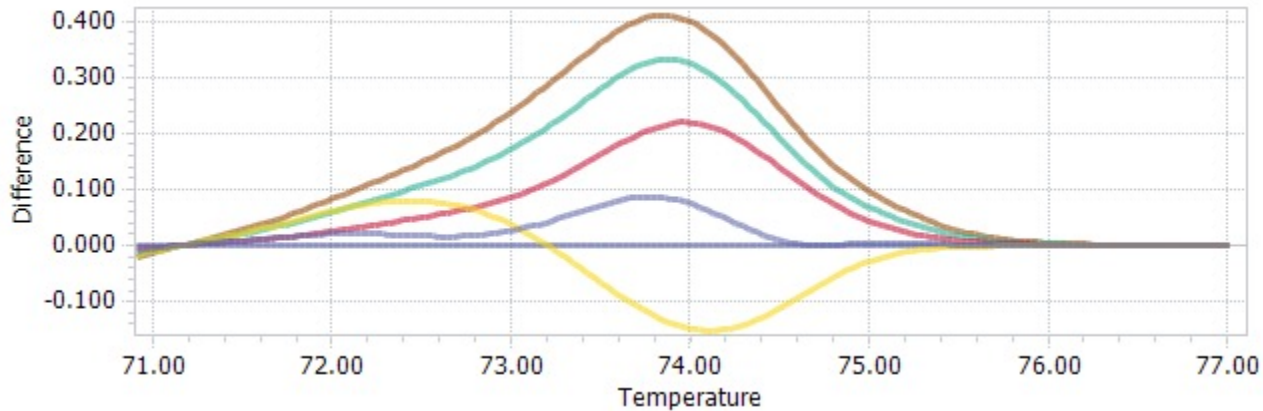

# HC8

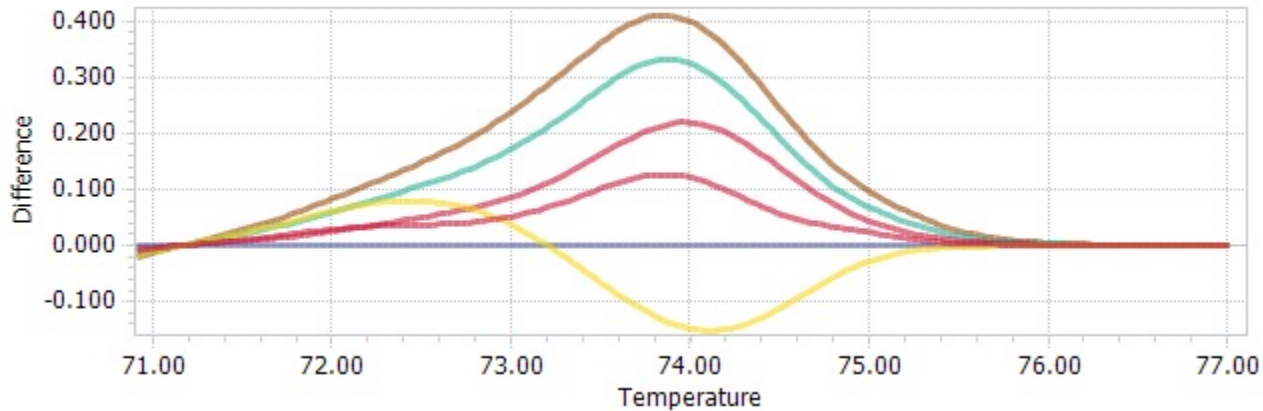



# HC9

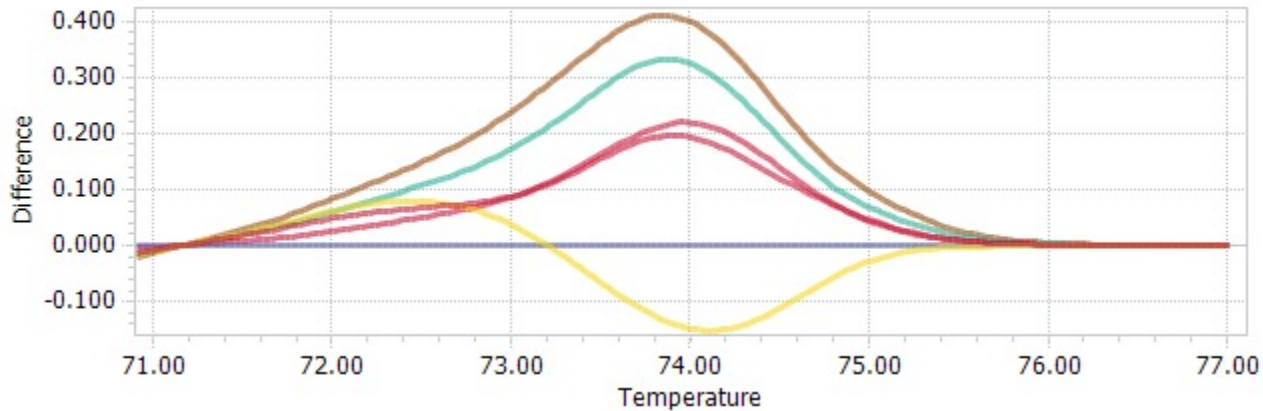

# HC10

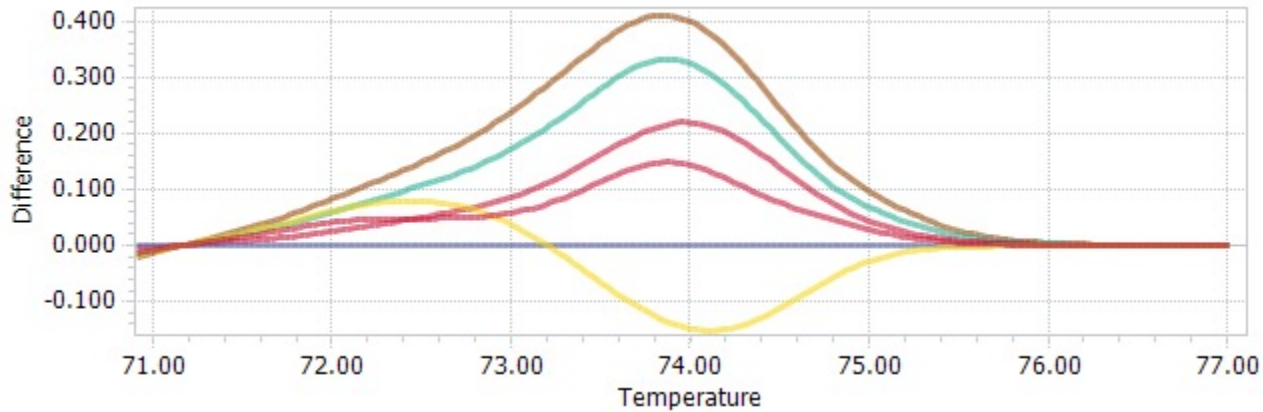

# HC11

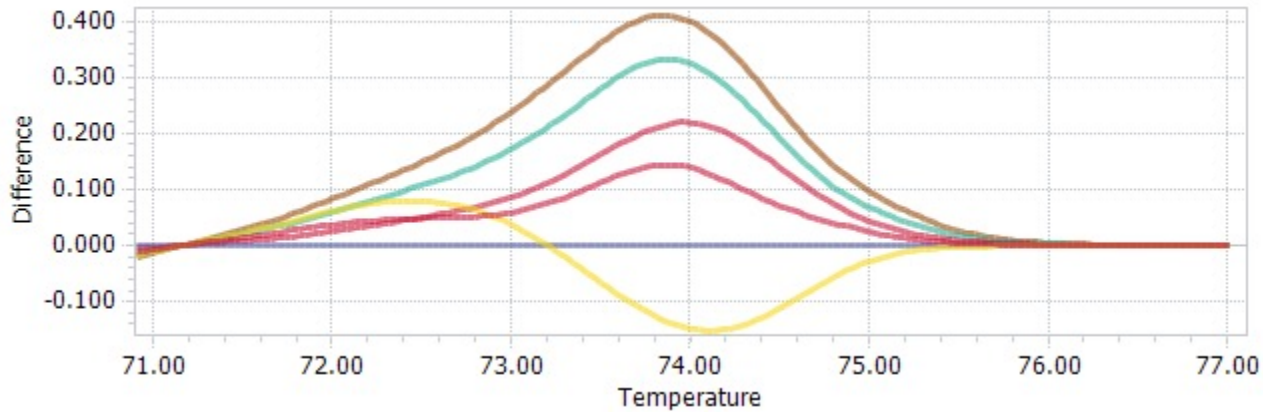

# HC12

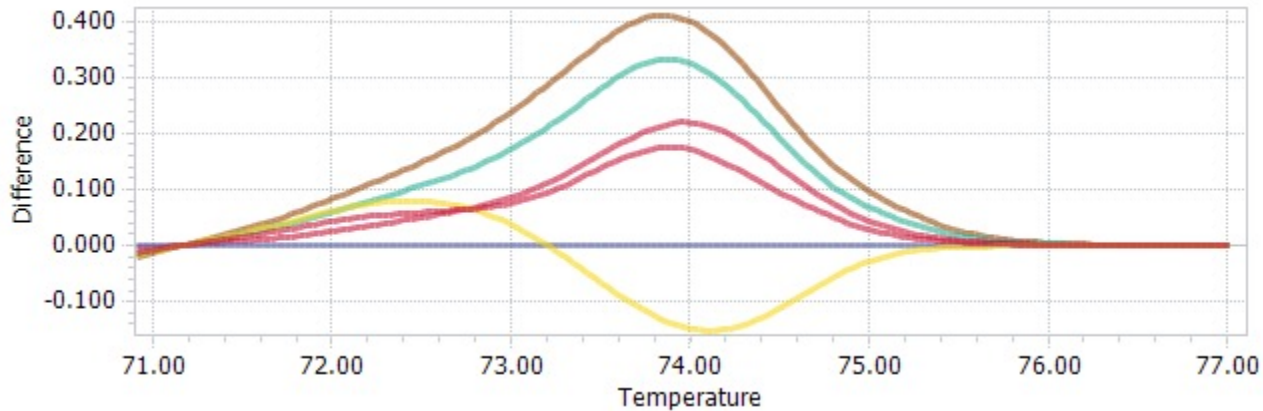

# SLE1

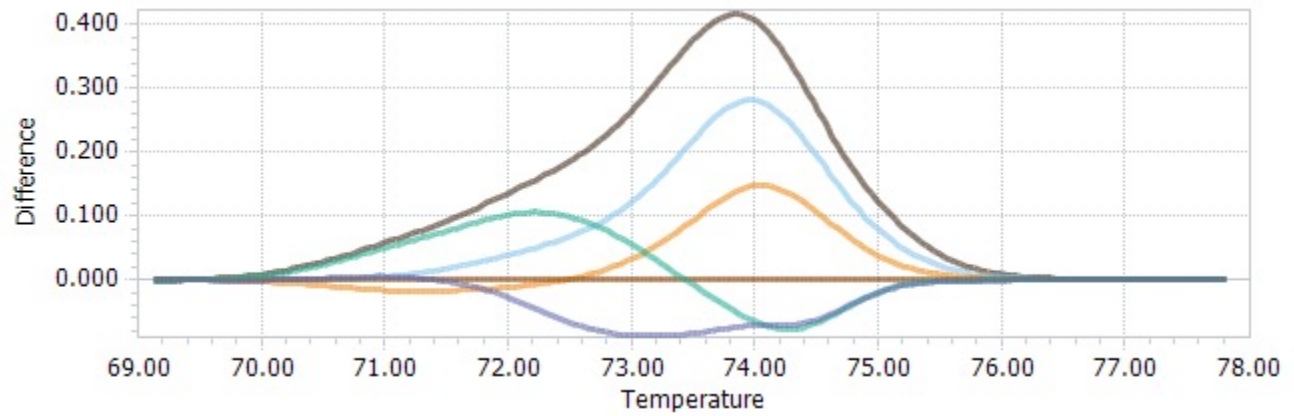

# SLE2

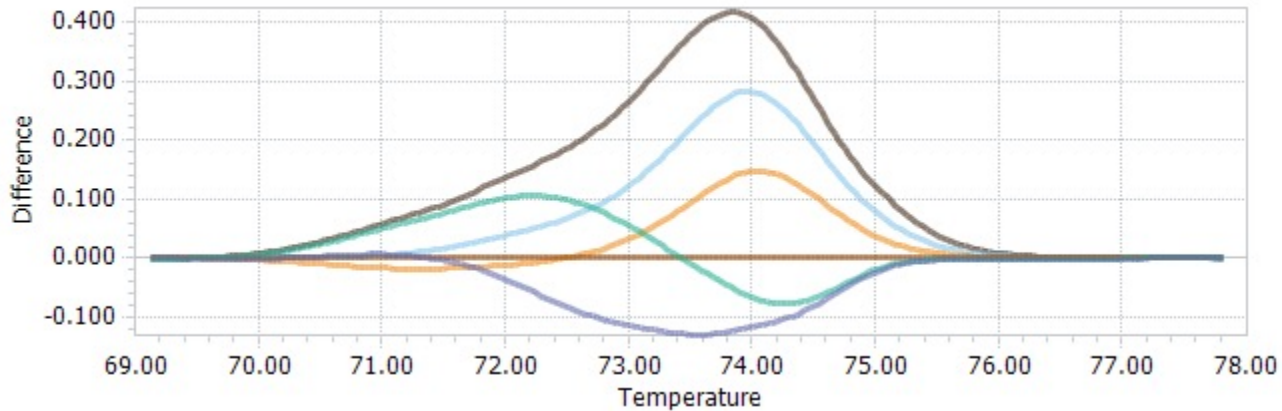

# SLE3

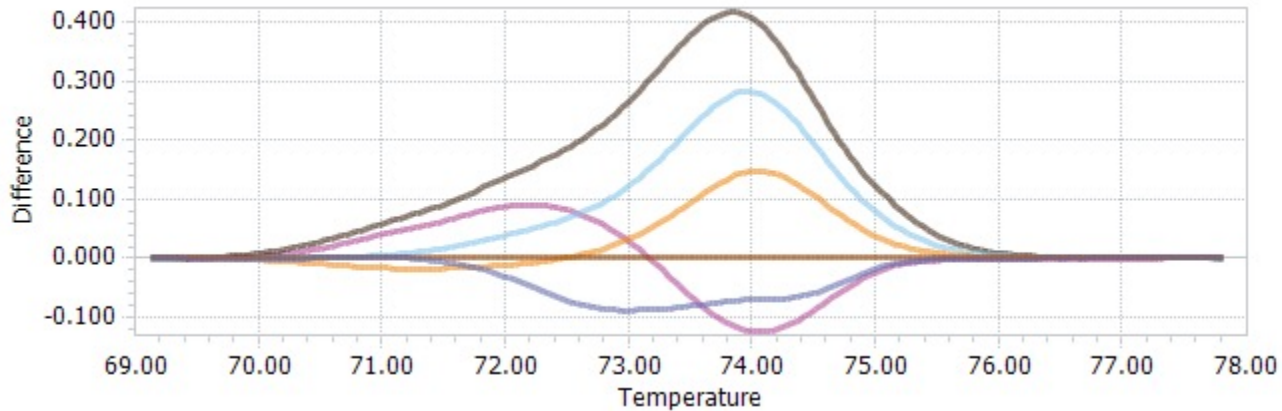

# SLE4

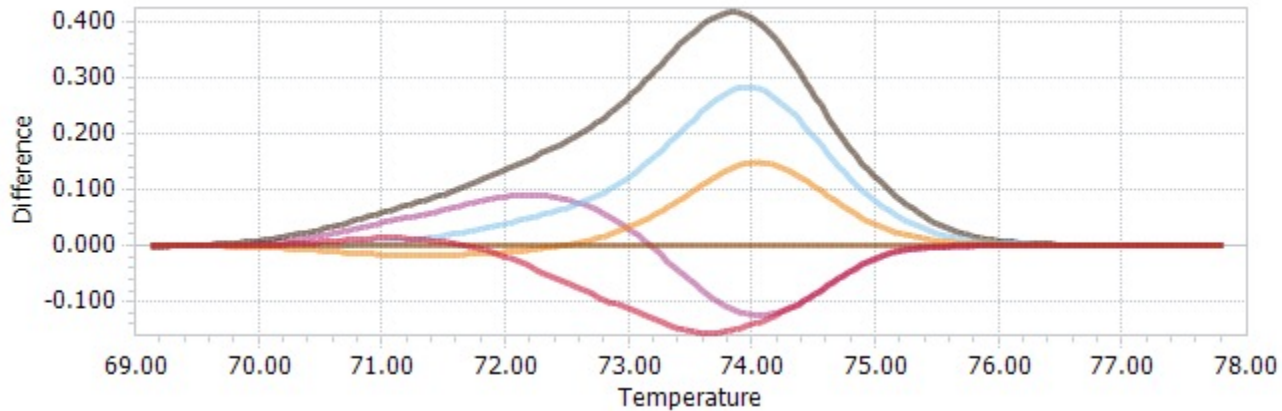



# SLE5

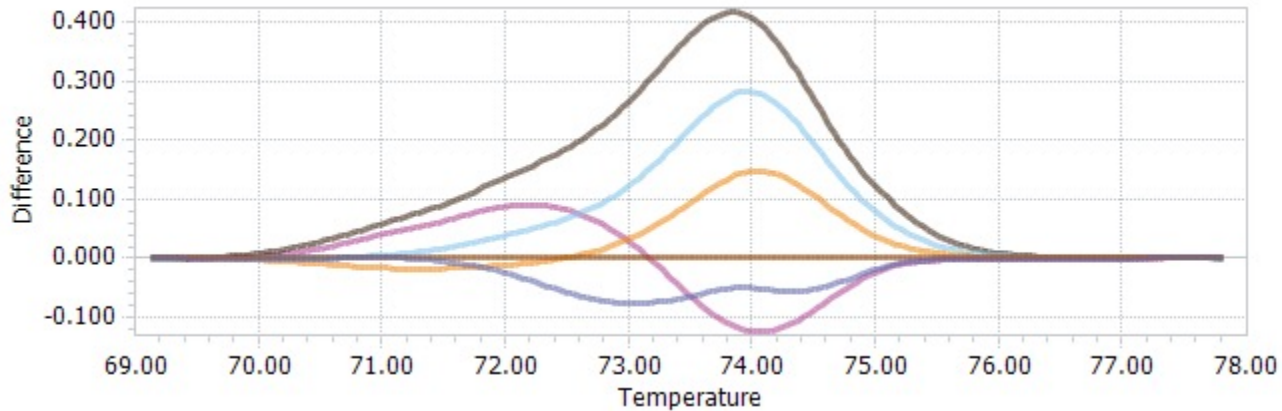

# SLE6

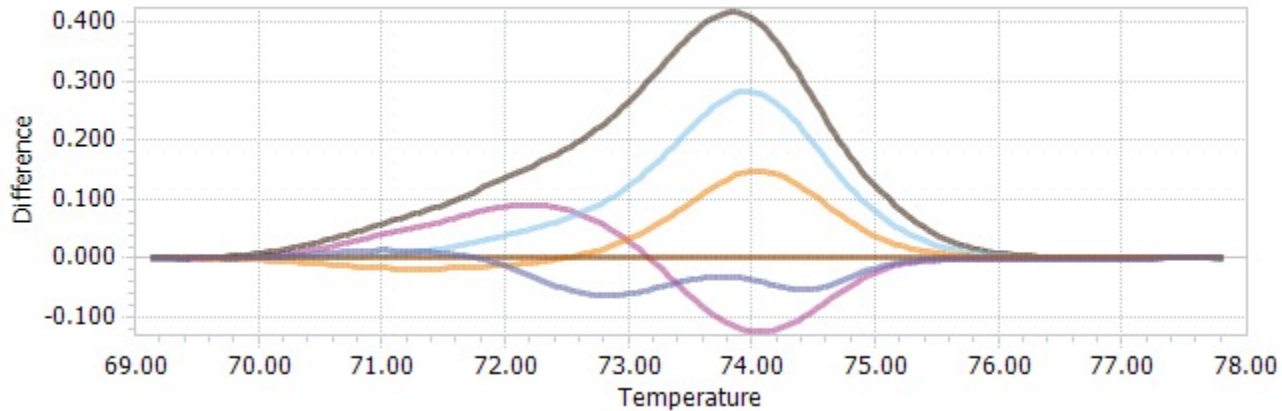

# SLE7

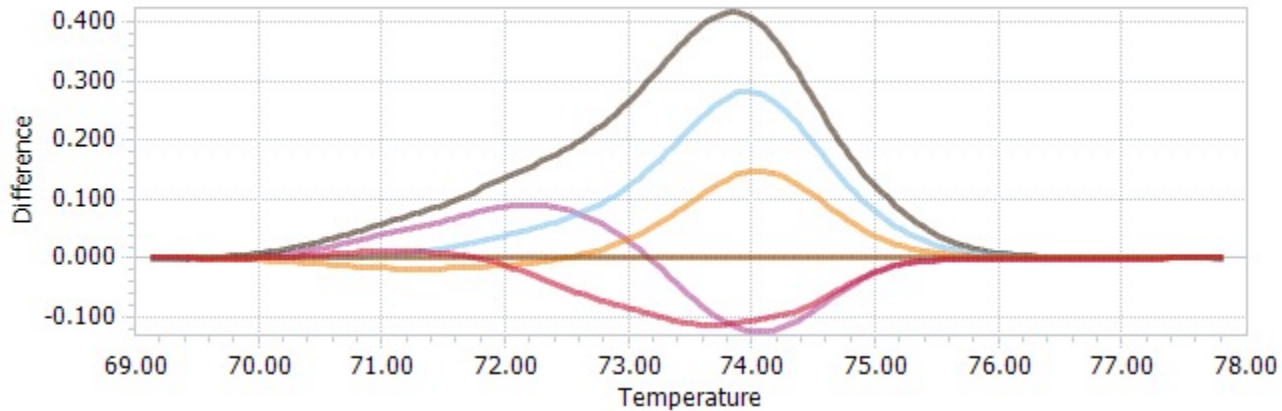

# SLE8

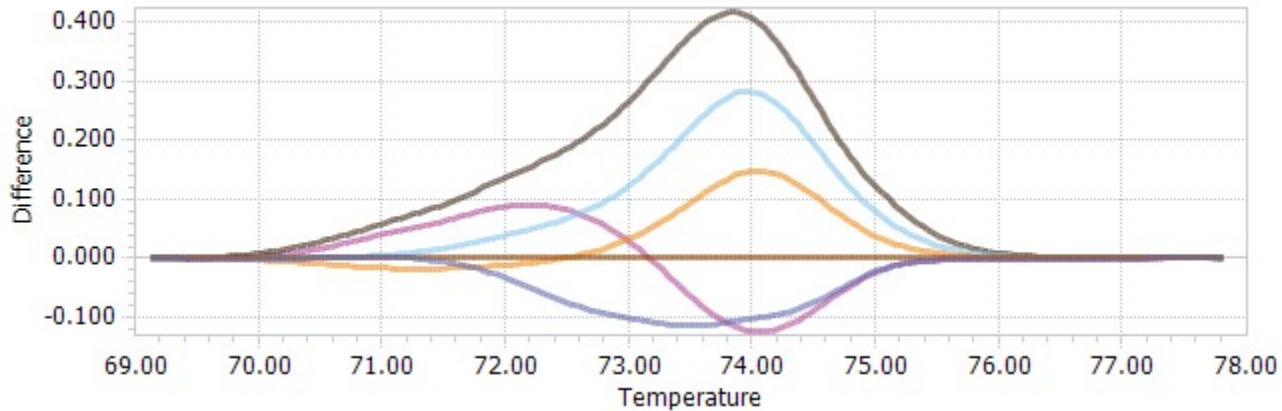

# SLE9

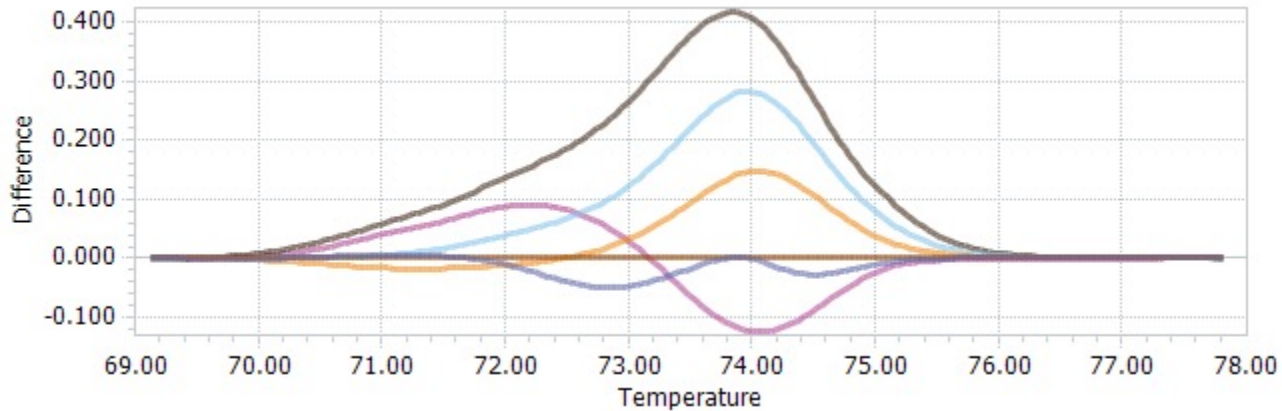

# SLE10

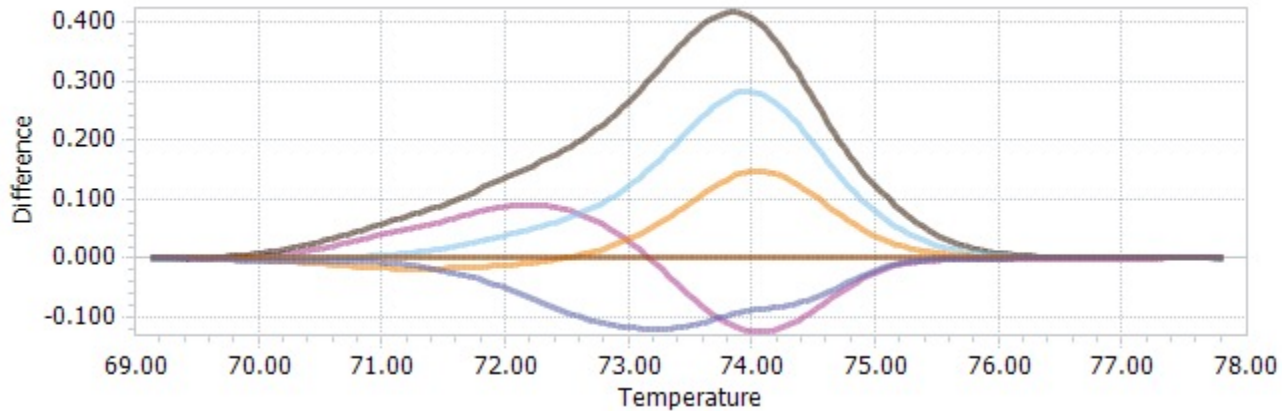

# SLE11

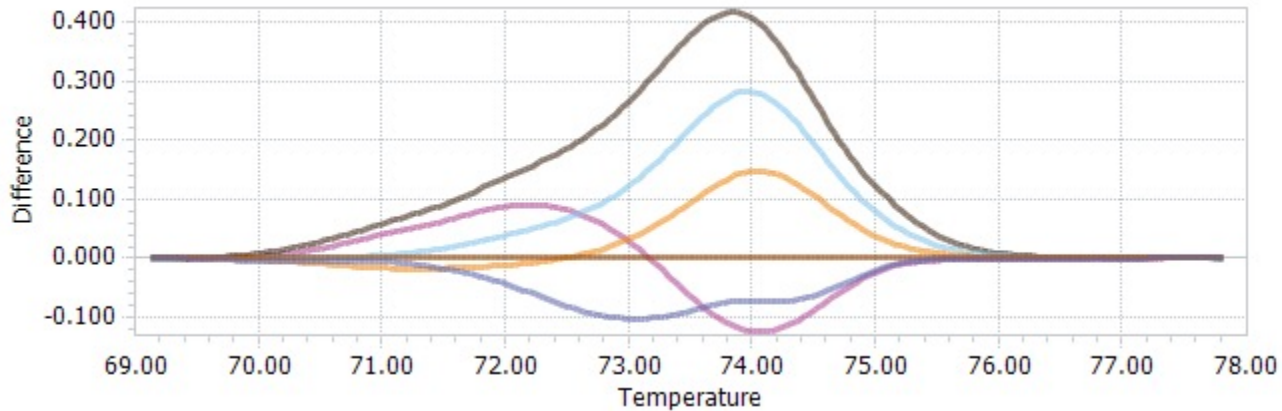

# SLE12

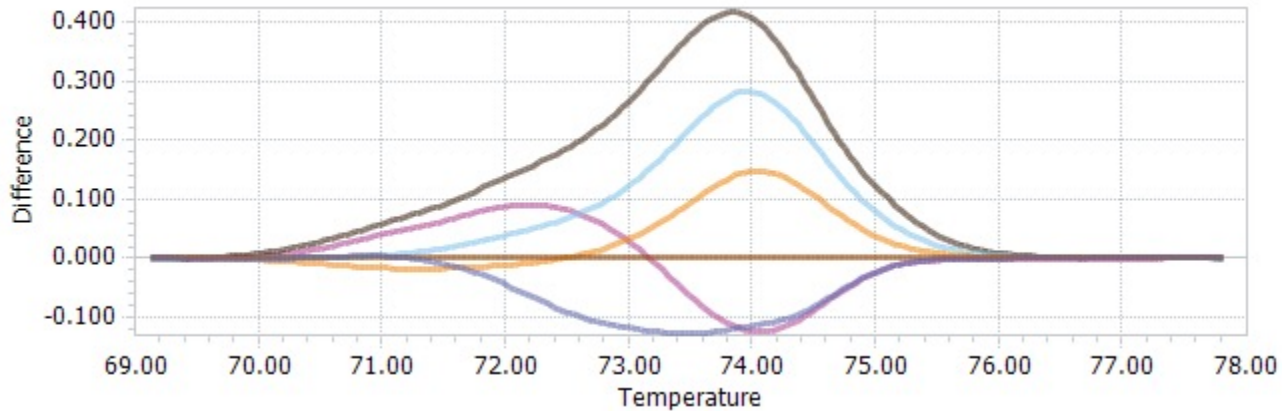



# SLE13

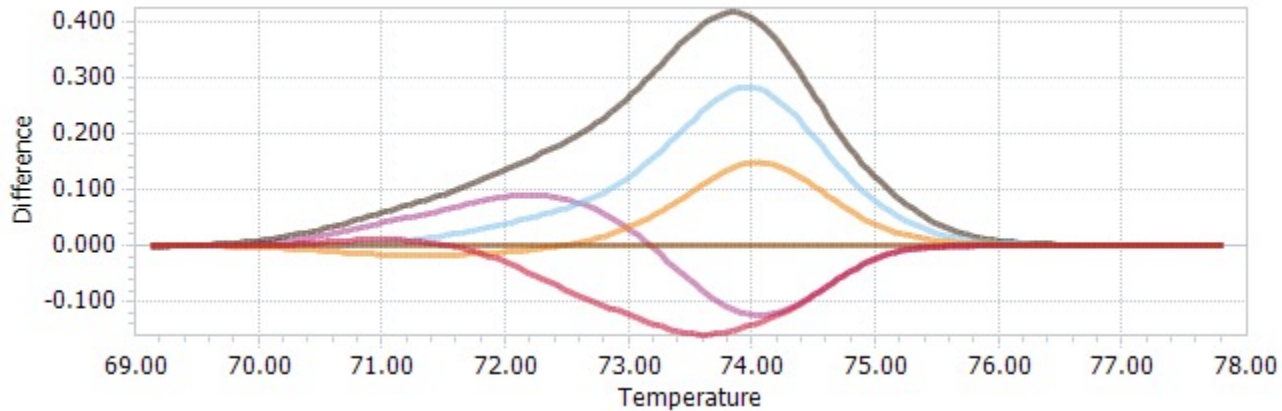

# SLE14

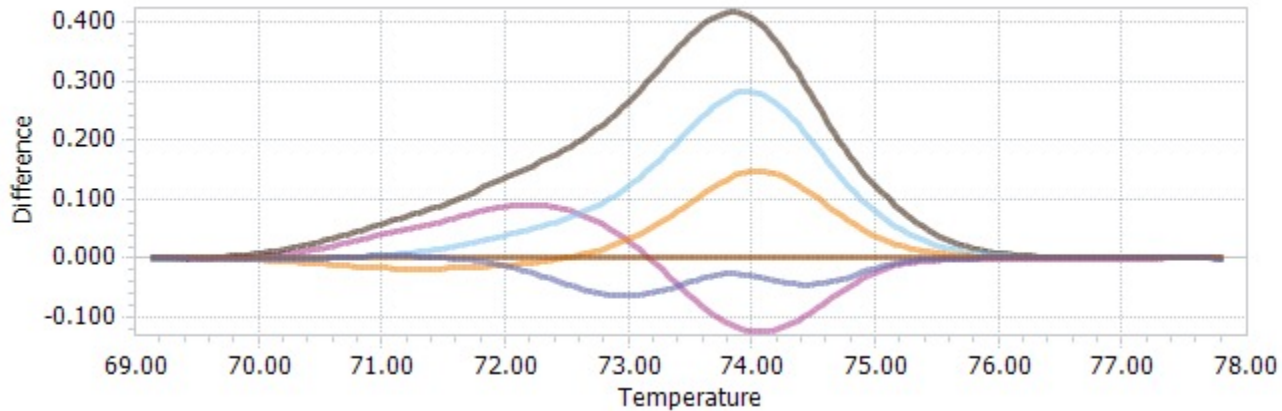

# SLE15

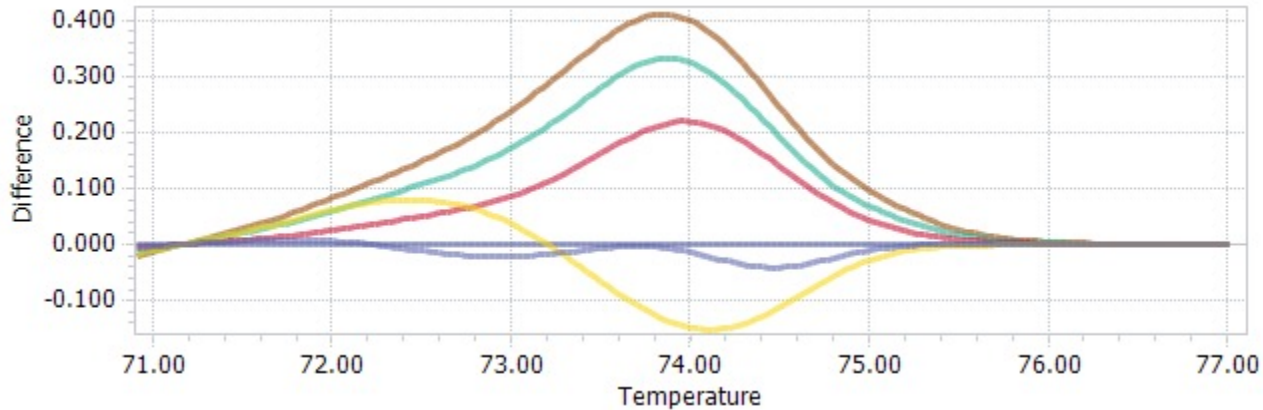

# SLE16

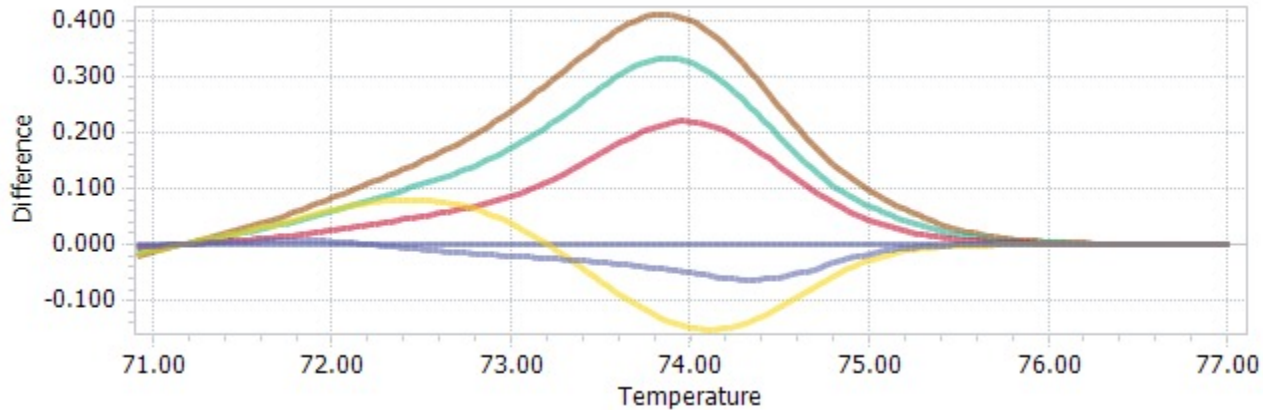

# SLE17

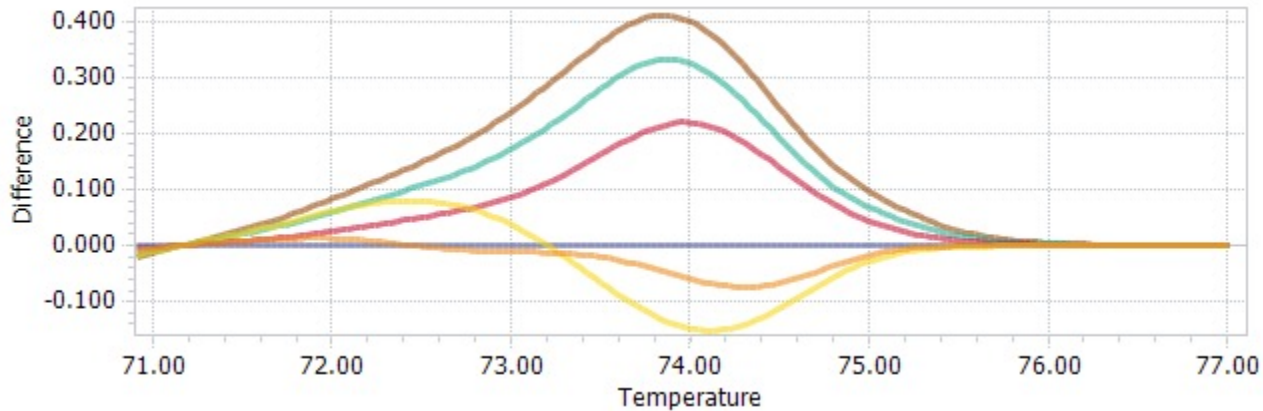

# SLE18

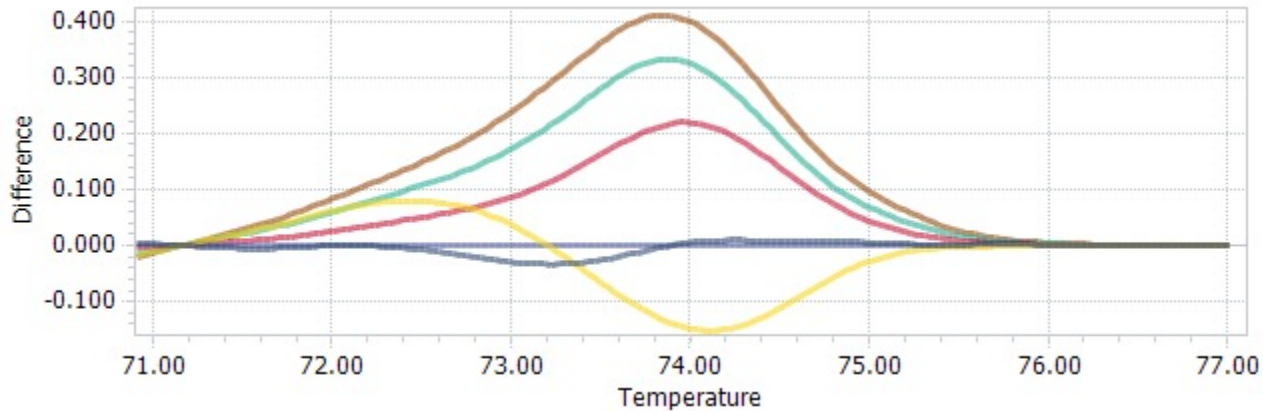

# SLE19

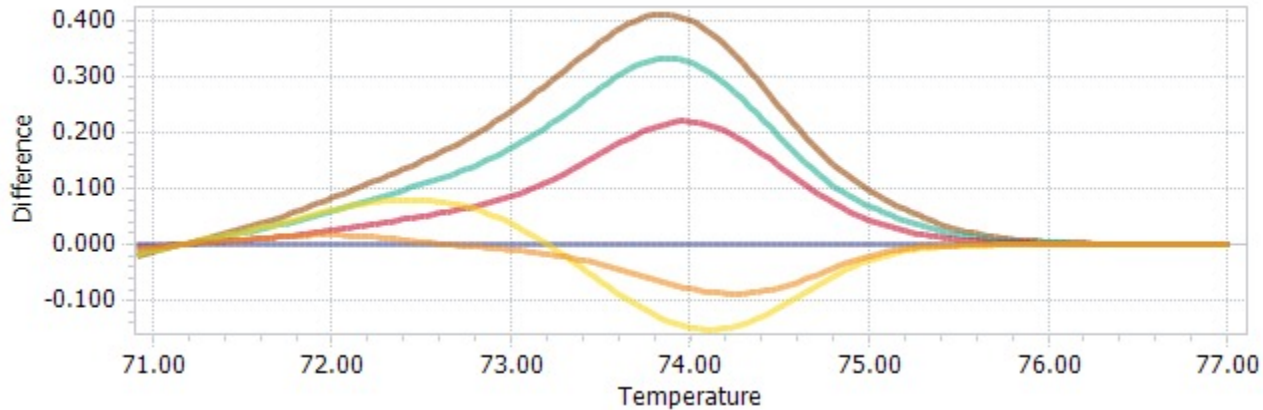

# SLE20

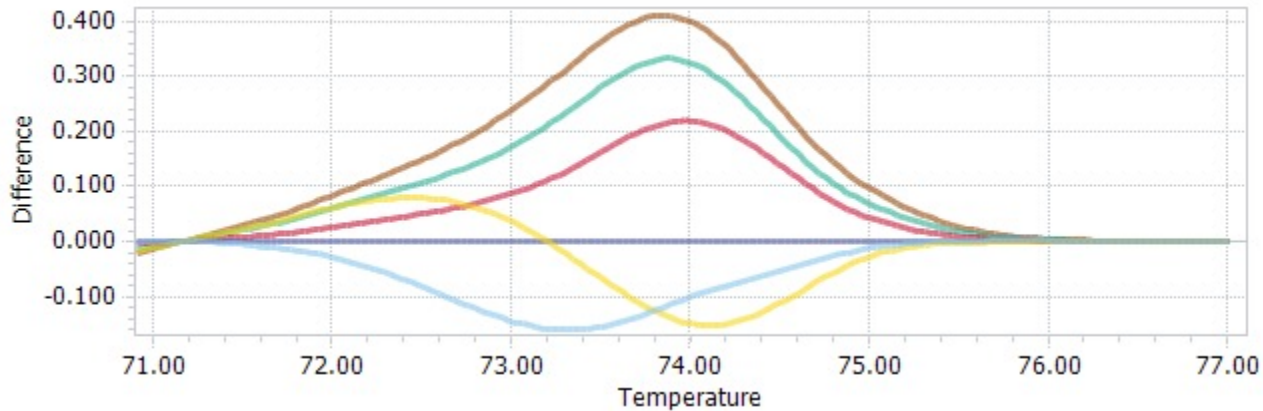



# SLE21

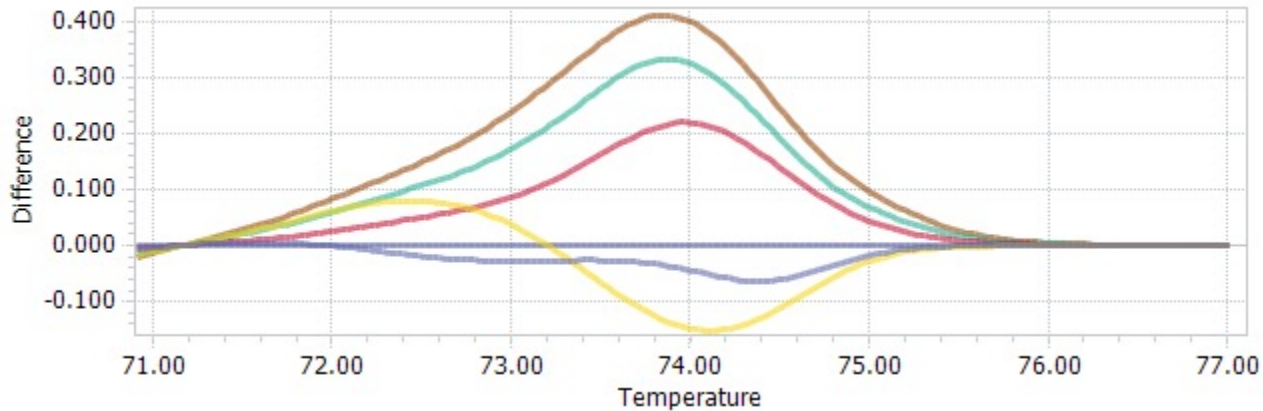

# SLE22

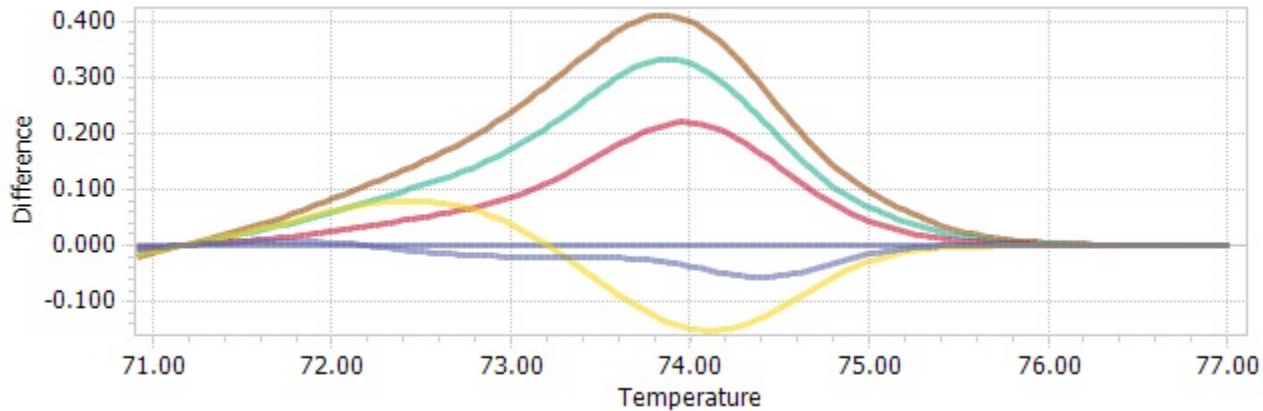

# SLE23

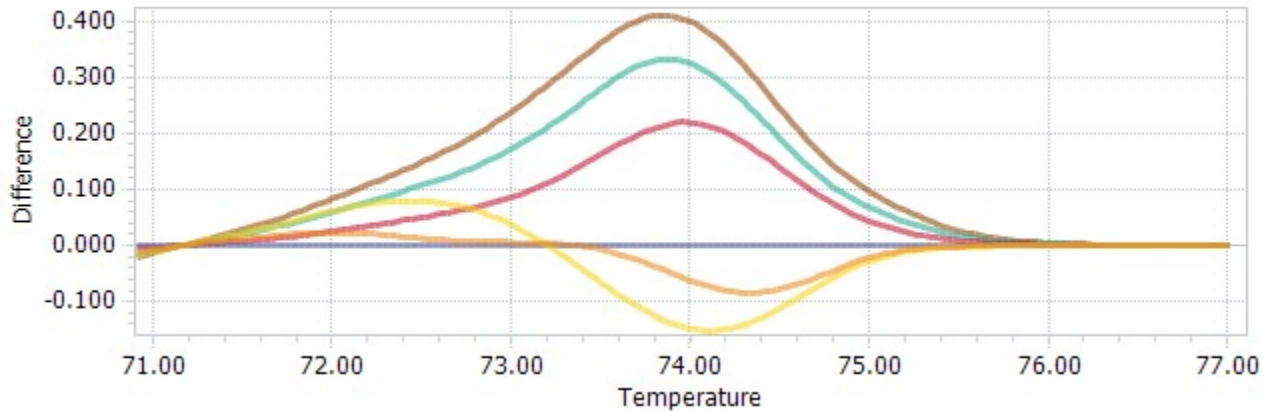

# SLE24

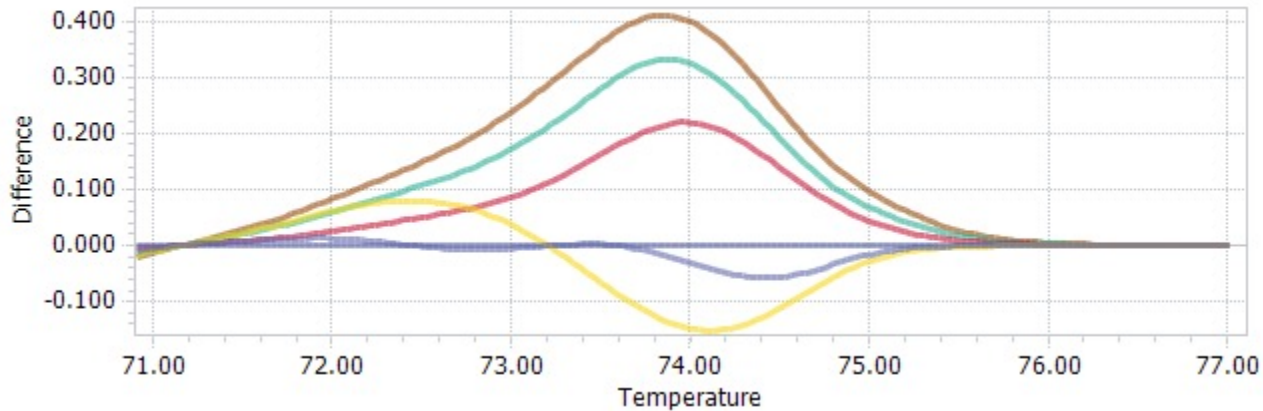

# SLE25

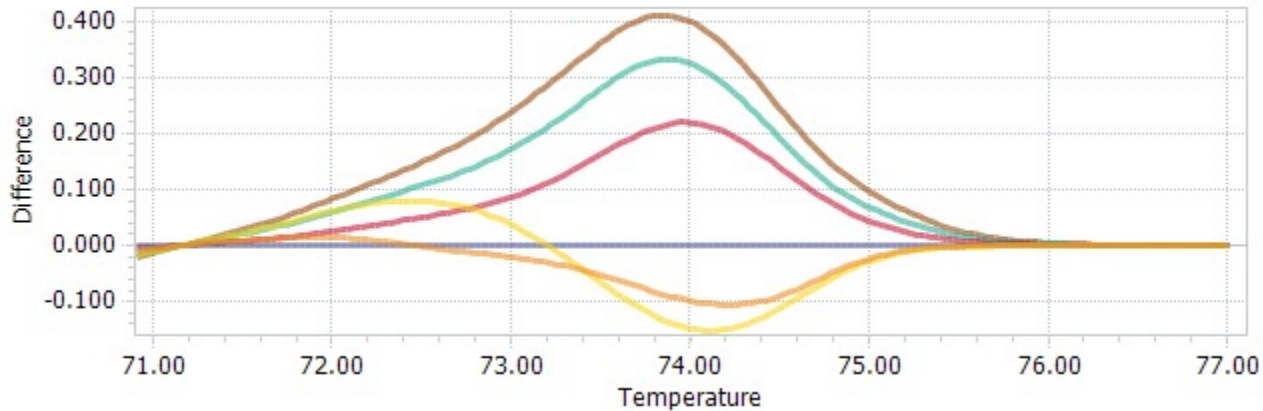

# SLE26

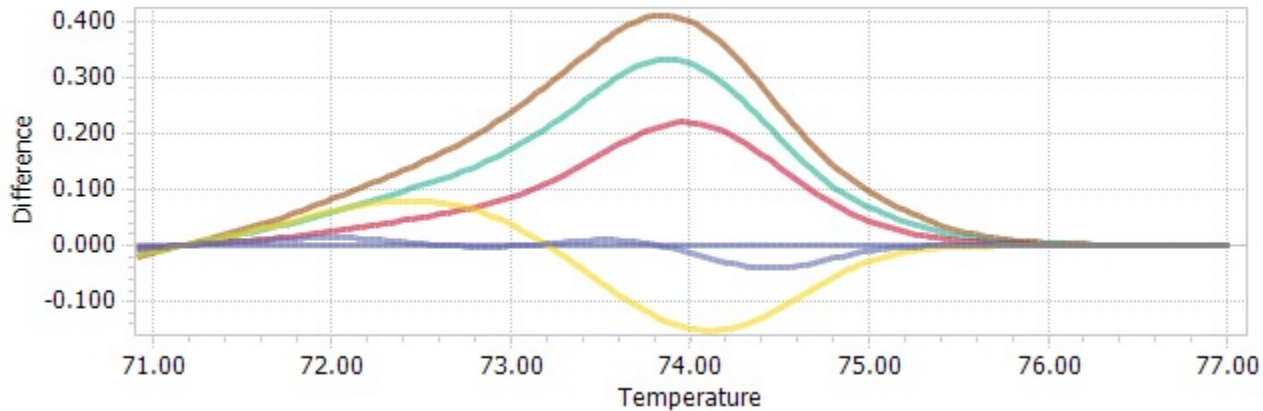

# SLE27

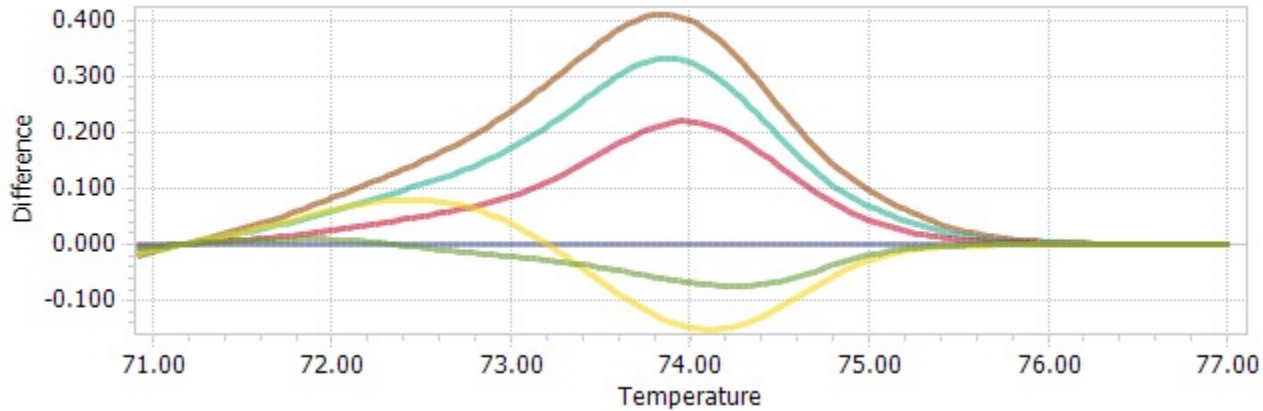

# SLE28

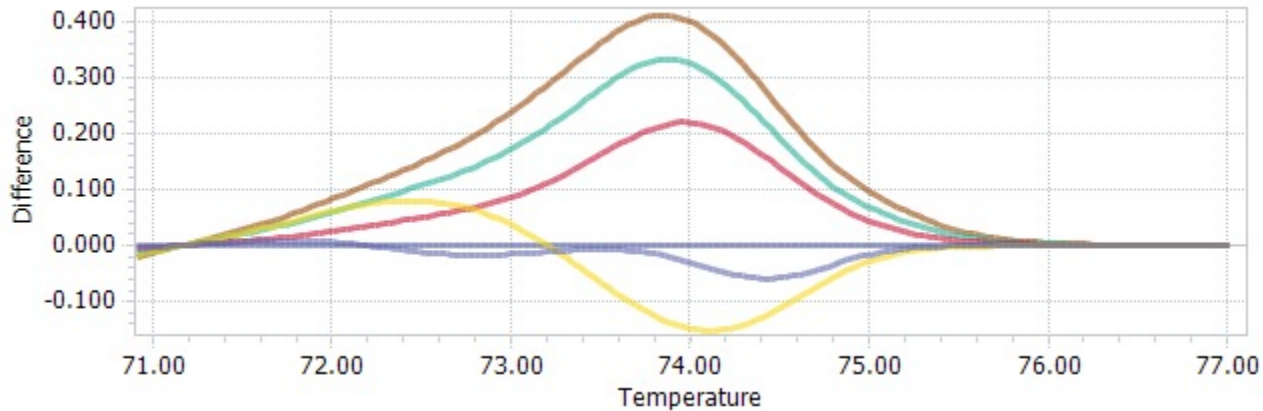



# SLE29

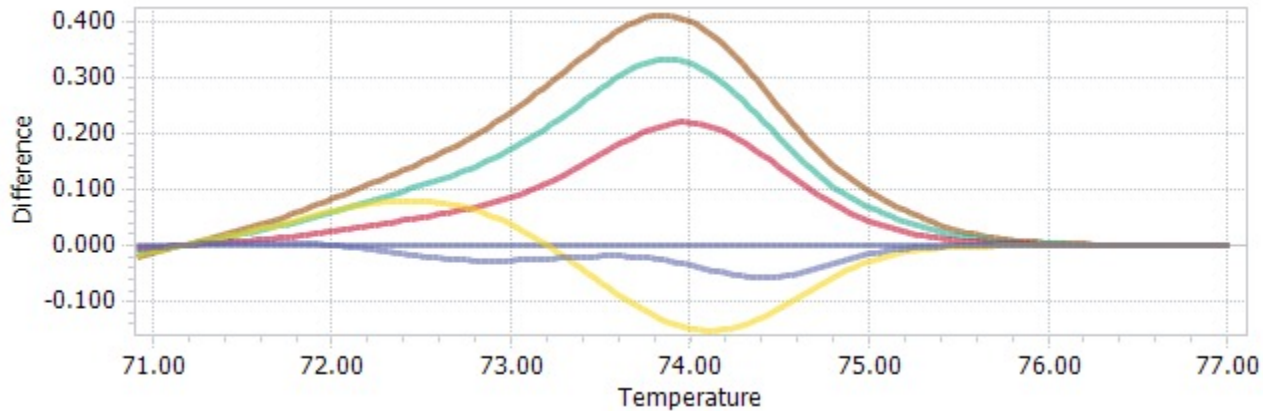

# SLE30

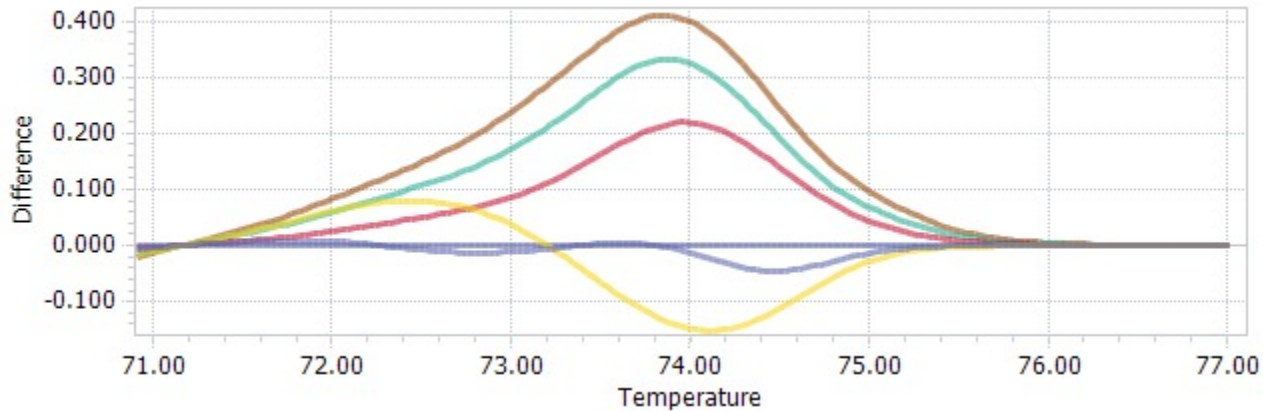

# SLE31

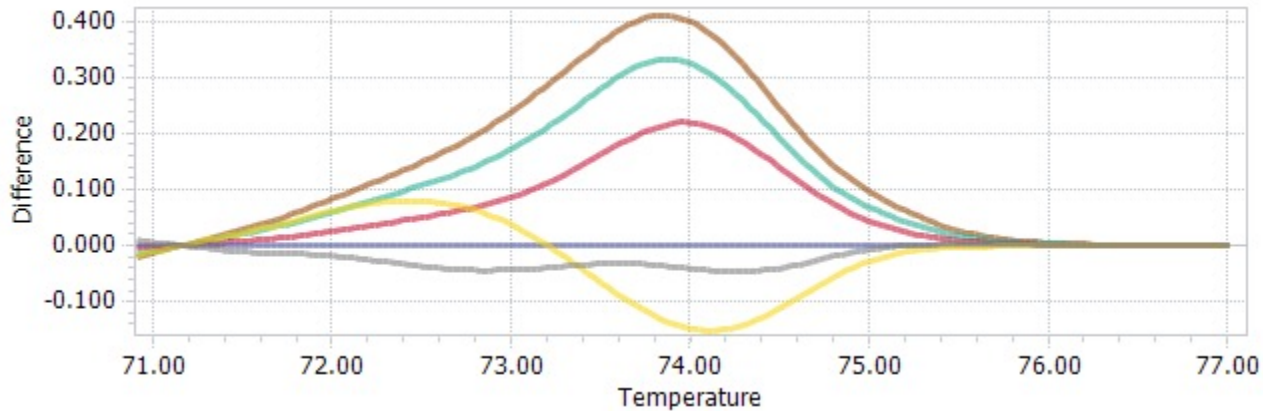

# SLE32

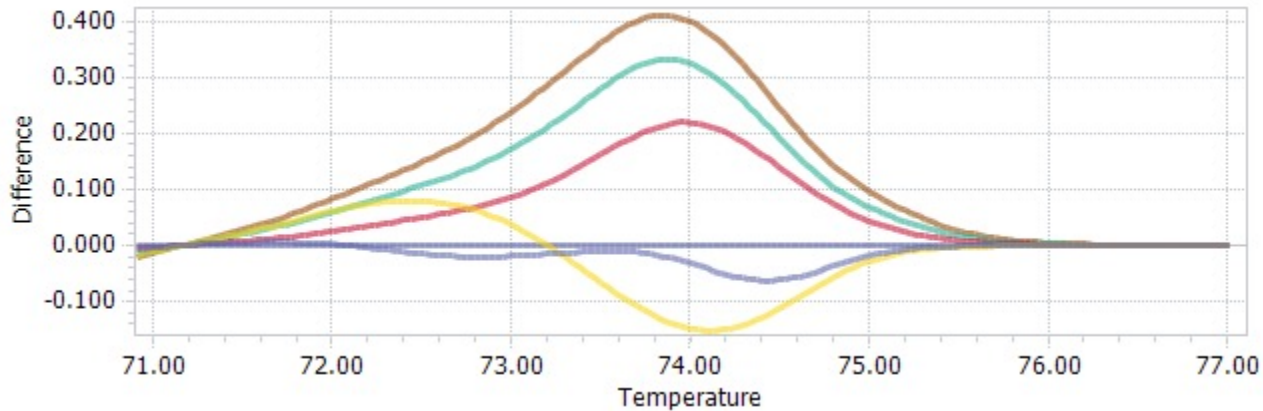

# SLE33

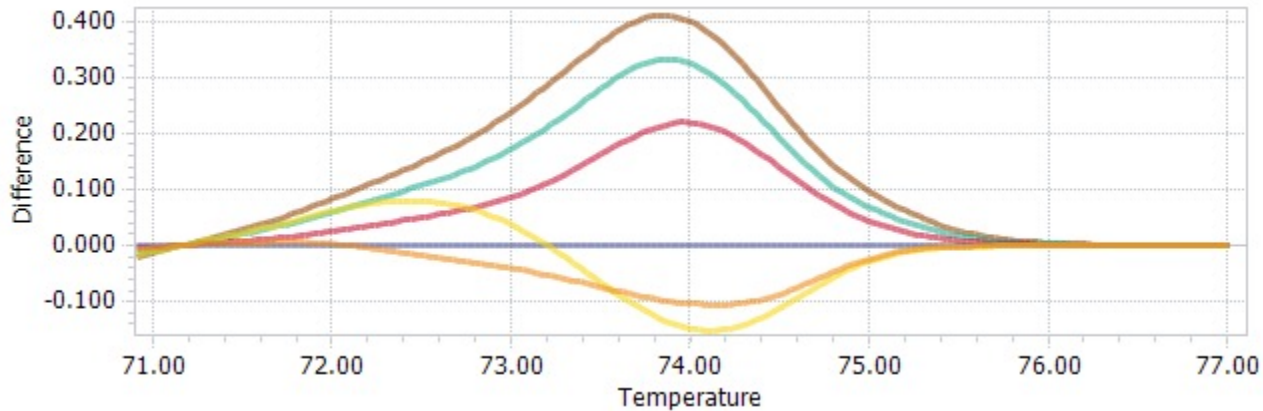

# SLE34

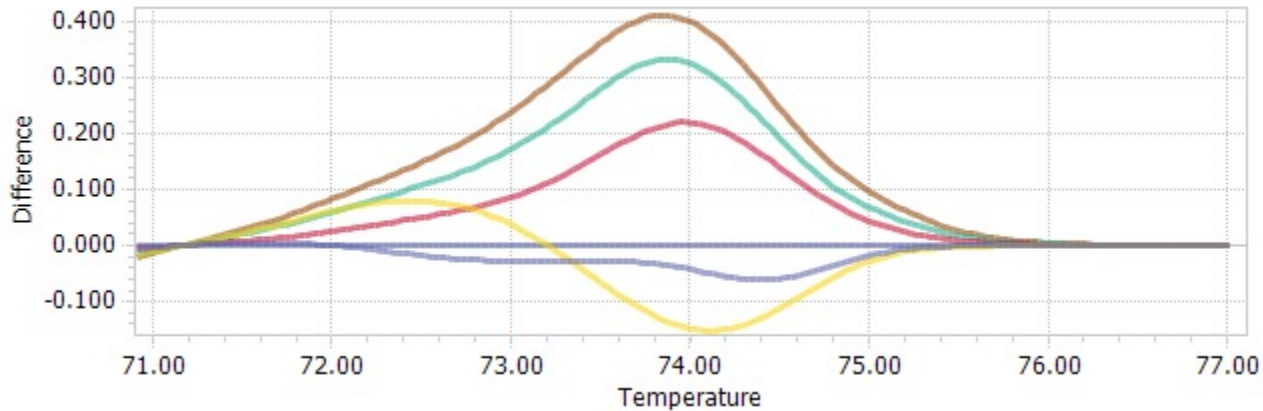

# SLE35

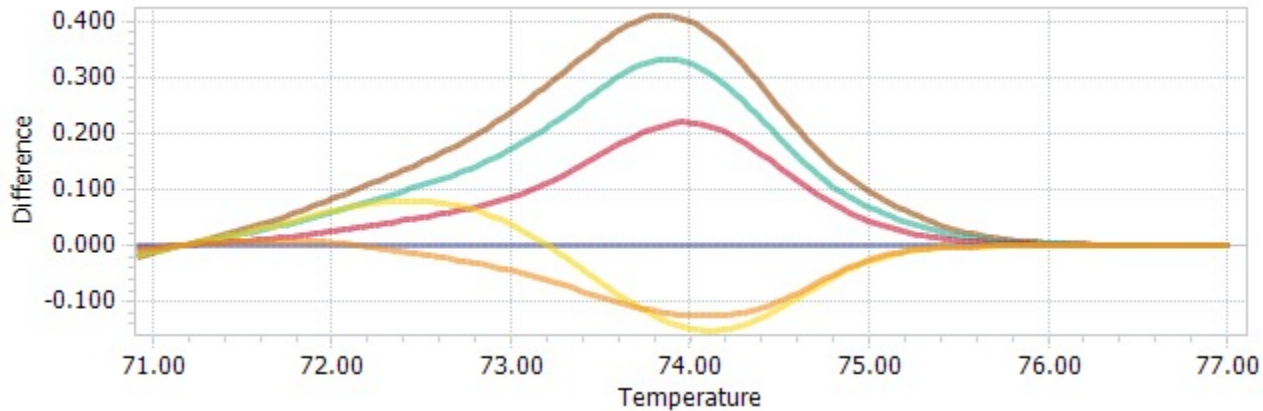

# SLE36

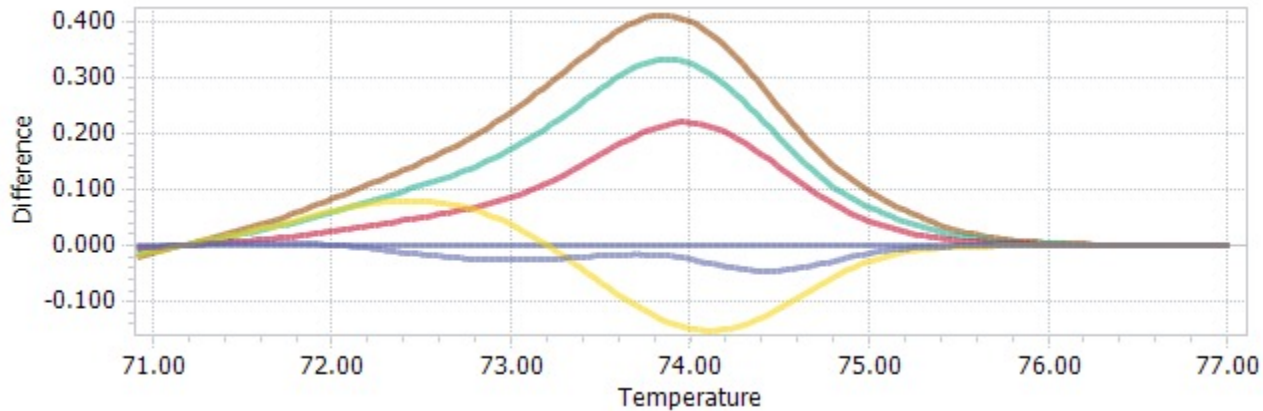



# SLE37

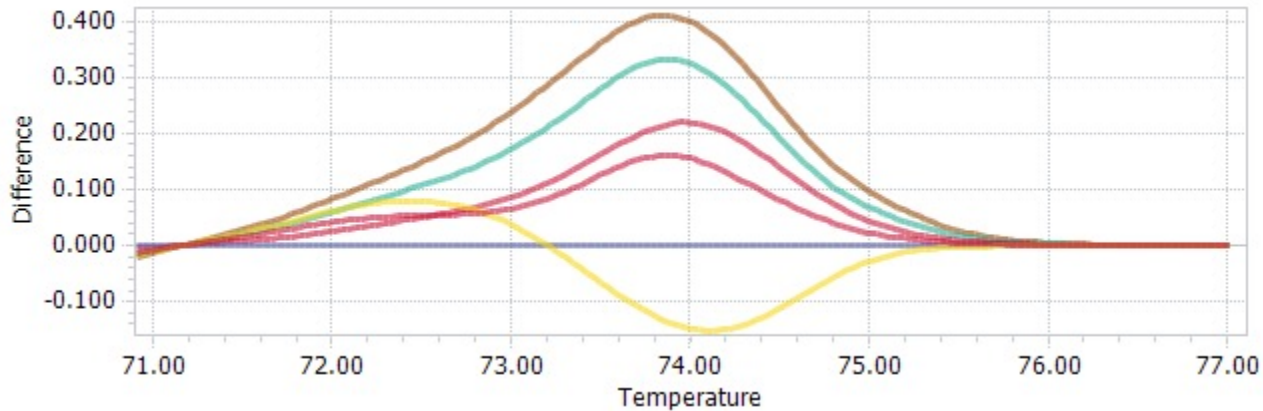

# SLE38

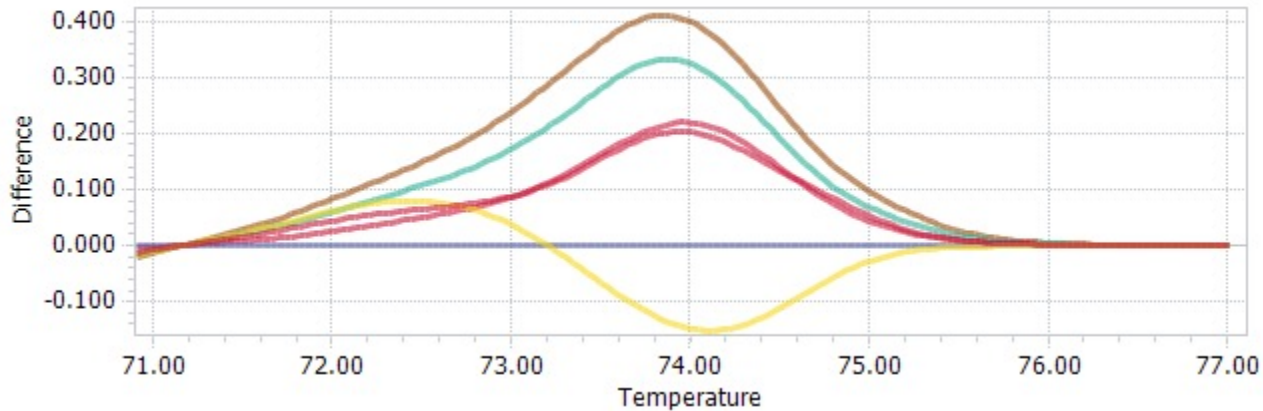

# SLE39

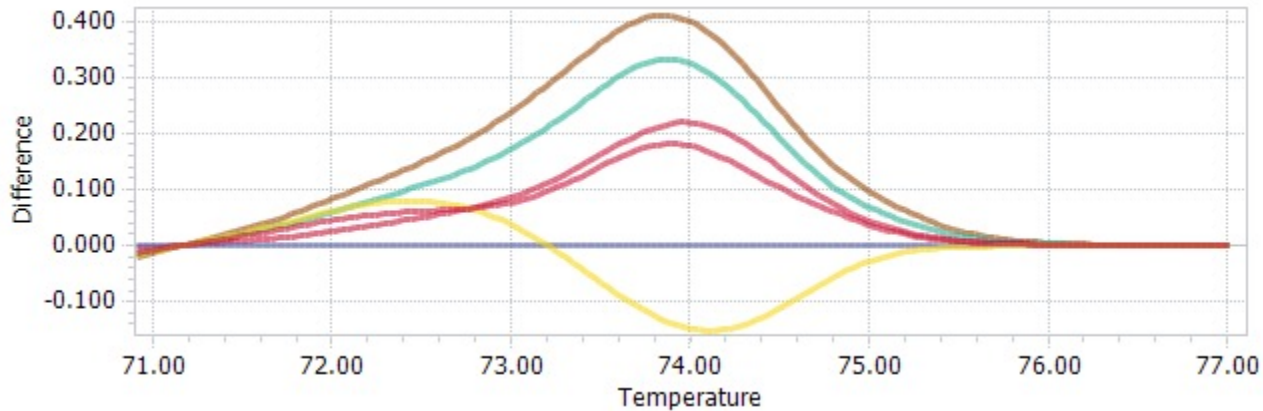

# SLE40

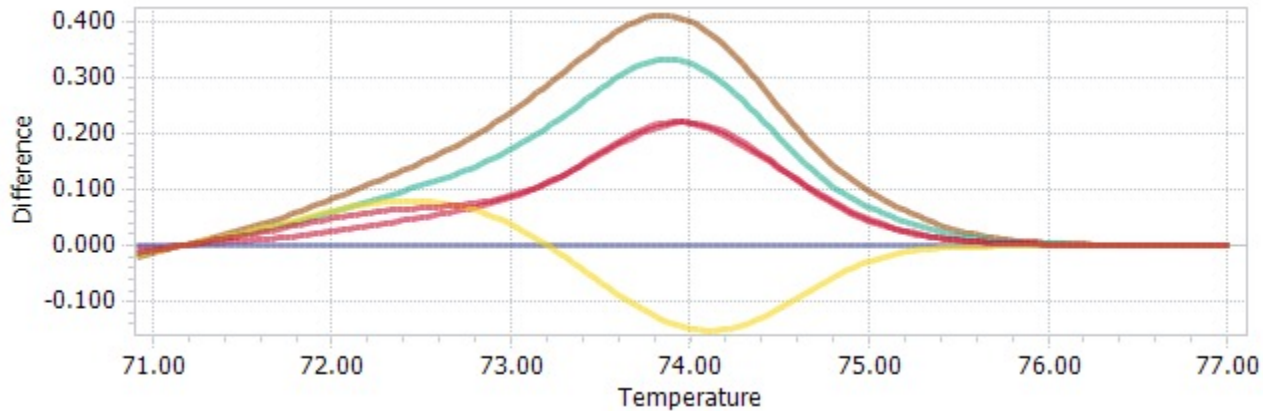

# SLE41

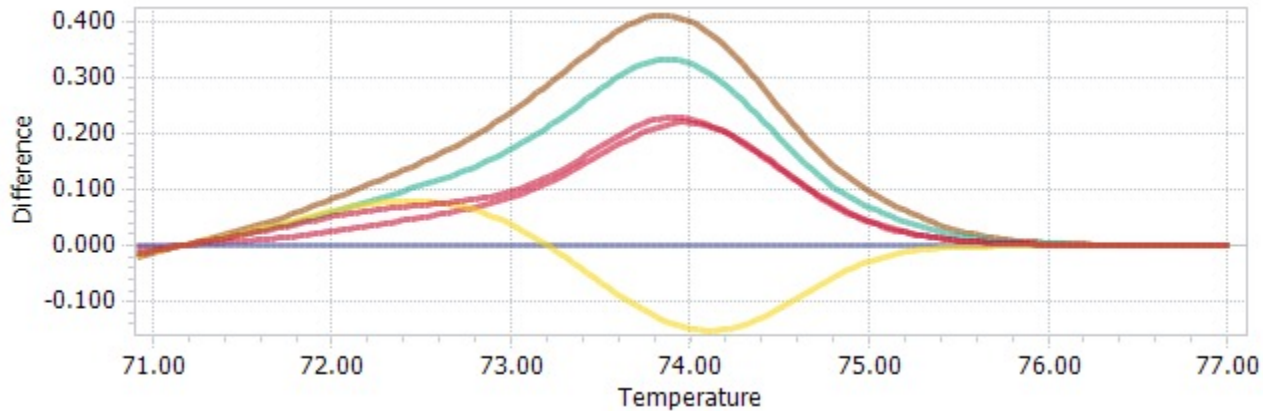

# SLE42

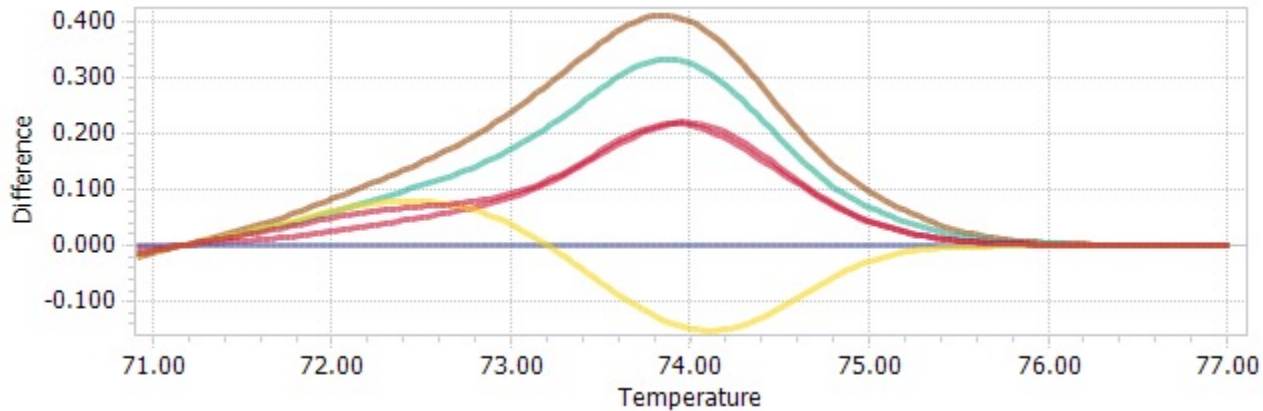

# SLE43

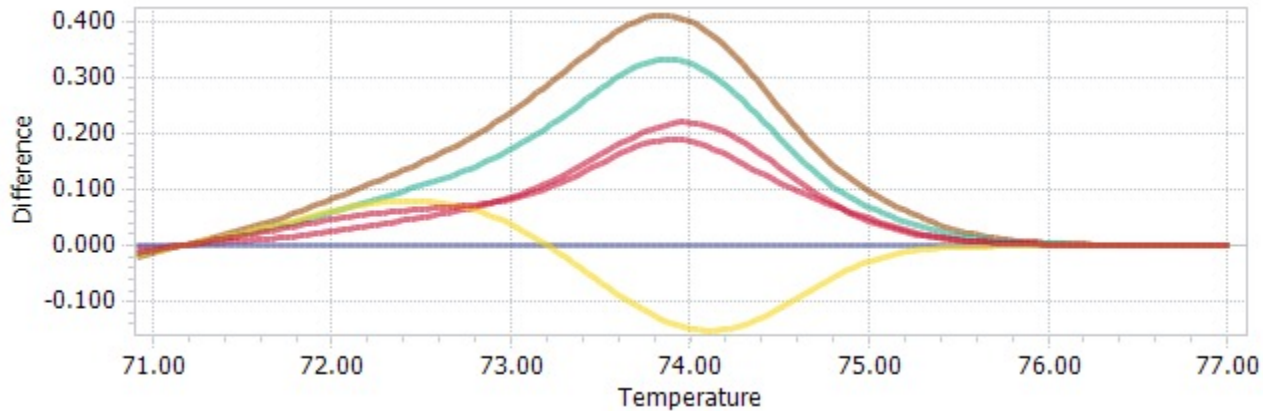

# SLE44

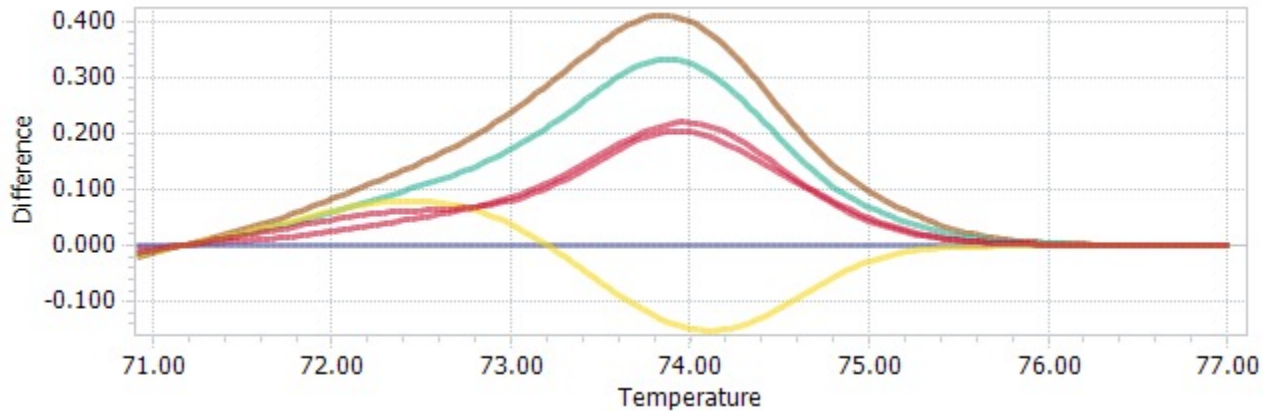



# SLE45

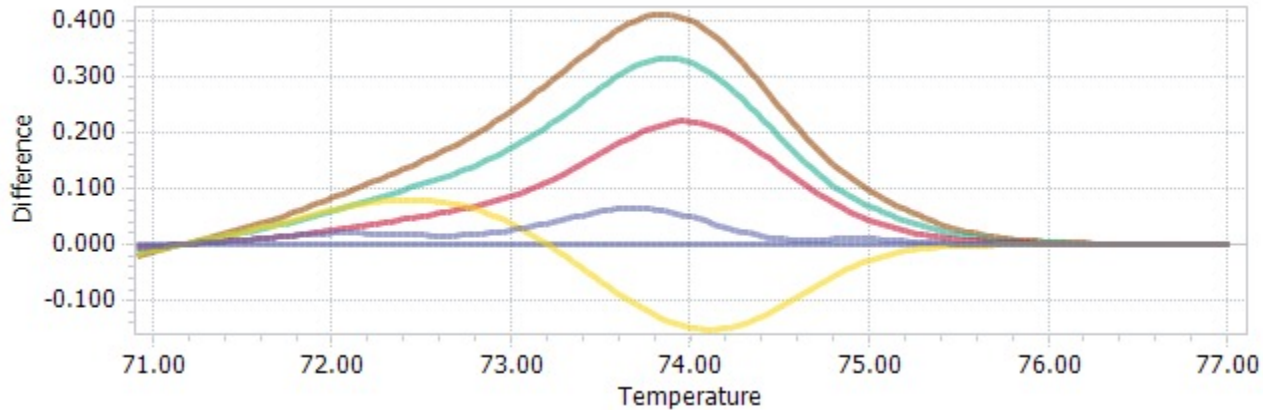

# SLE46

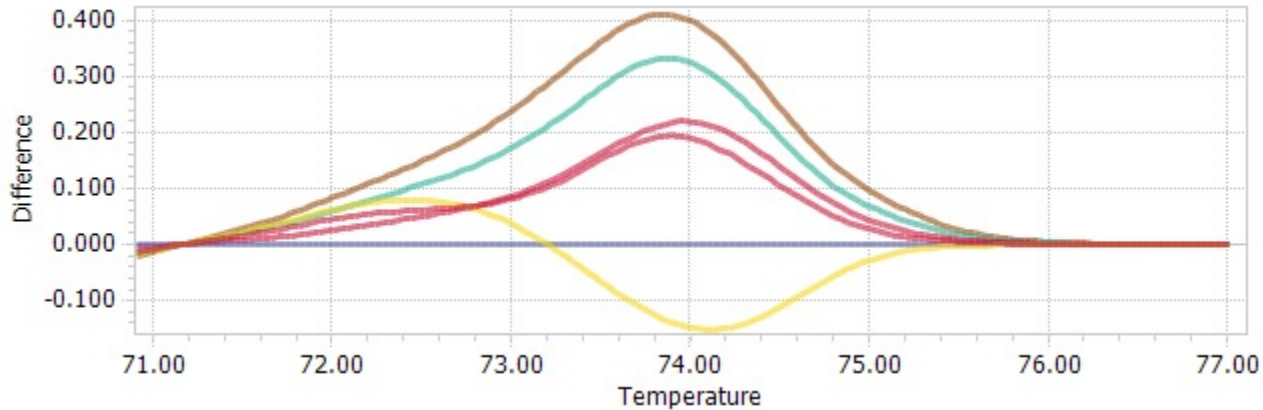

# SLE47

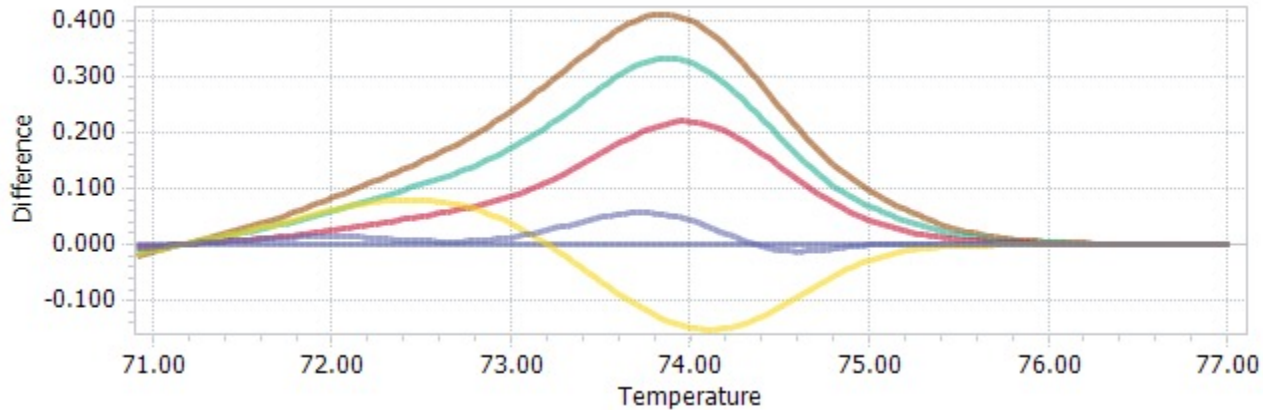

# SLE48

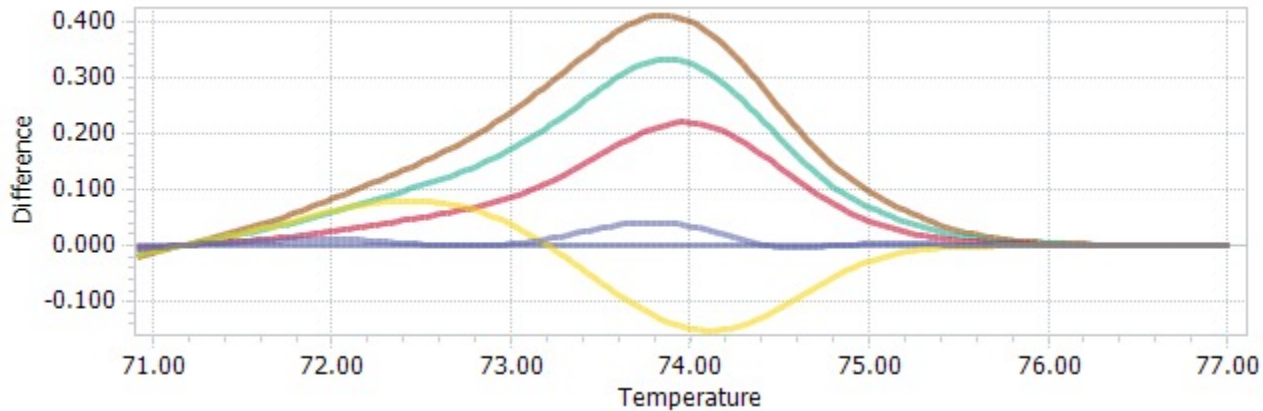

# SLE49

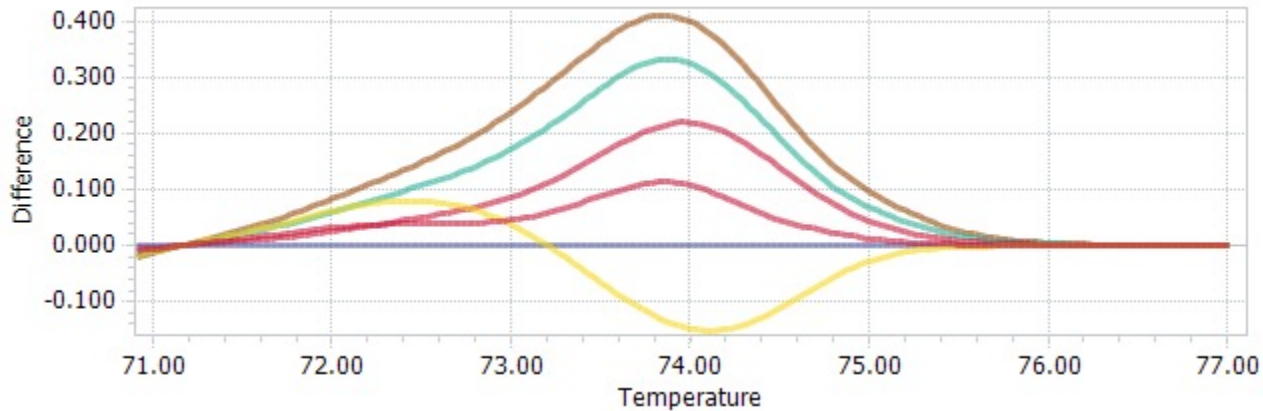

Supplement: 41390_2024_3135_MOESM3_ESM.pdf [file 41390_2024_3135_MOESM3_ESM.pdf]
