# Supplementary material for: DNA methylation of IFI44L as a potential blood biomarker for childhood-onset systemic lupus erythematosus
Source: PubMed Central journal article supplement (PMC11343705; doi:10.1038/s41390-024-03135-1), 2024-03-21
Supplement: 41390_2024_3135_MOESM1_ESM.pdf [file 41390_2024_3135_MOESM1_ESM.pdf]

<https://www.jianguoyun.com/p/DfgNEdIQ08zbCxihio0FIAA>
