# Supplementary material for: DNA methylation of IFI44L as a potential blood biomarker for childhood-onset systemic lupus erythematosus
Source: PubMed Central journal article supplement (PMC11343705; doi:10.1038/s41390-024-03135-1), 2024-03-21
Supplement: 41390_2024_3135_MOESM5_ESM.pdf [file 41390_2024_3135_MOESM5_ESM.pdf]

中南大学湘雅二医院临床研究伦理委员会  
临床研究审查意见

(2022) 伦审【临研】第(063)号

|                                                                                                                                               |                                                                                                                                                                                                                              |                                                               |                                                                        |                                            |   |
|-----------------------------------------------------------------------------------------------------------------------------------------------|------------------------------------------------------------------------------------------------------------------------------------------------------------------------------------------------------------------------------|---------------------------------------------------------------|------------------------------------------------------------------------|--------------------------------------------|---|
| 项目名称                                                                                                                                          | 儿童 SLE 精准诊疗体系的研究                                                                                                                                                                                                             |                                                               |                                                                        |                                            |   |
| 发起单位                                                                                                                                          | 中南大学湘雅二医院                                                                                                                                                                                                                    |                                                               |                                                                        |                                            |   |
| 主要研究者                                                                                                                                         | 吴小川/主任医师                                                                                                                                                                                                                     | 专业                                                            | 儿科                                                                     |                                            |   |
| 研究性质                                                                                                                                          | <input checked="" type="checkbox"/> 回顾性<br><input type="checkbox"/> 预后观察性                                                                                                                                                    | <input type="checkbox"/> 诊断性<br><input type="checkbox"/> 问卷调查 | <input checked="" type="checkbox"/> 干预性<br><input type="checkbox"/> 其他 | <input checked="" type="checkbox"/> 生物标本利用 |   |
| 经费来源                                                                                                                                          | 中央财政专项资金                                                                                                                                                                                                                     |                                                               |                                                                        |                                            |   |
| 审查方式                                                                                                                                          | <input checked="" type="checkbox"/> 会议审查<br><input type="checkbox"/> 快速审查                                                                                                                                                    | 审查地点                                                          | 精卫楼 19 楼机构会议室                                                          |                                            |   |
| 委员人数                                                                                                                                          | 13 人                                                                                                                                                                                                                         | 到会委员人数                                                        | 13 人                                                                   | 回避委员                                       | 无 |
| 邀请专家                                                                                                                                          | 无                                                                                                                                                                                                                            | 材料形式审查                                                        | <input checked="" type="checkbox"/> 合格<br><input type="checkbox"/> 不合格 |                                            |   |
| 审阅及审评文件                                                                                                                                       | 1. 临床试验方案 (方案编号:2021YFC2702004、版本号:1.0、版本日期:2021.12.16);<br>2. 知情同意申请书 (版本号:1.0、版本日期:2021.12.16);<br>3. 研究者简历;<br>4. 参加中心列表;<br>5. 病例报告表(版本号:1.0、版本日期:2021.12.16);<br>6. 风险处置预案(版本号:1.0、版本日期:2021.12.16);<br>7. 人类遗传资源管理承诺书; |                                                               |                                                                        |                                            |   |
| 伦理委员会意见                                                                                                                                       | <input checked="" type="checkbox"/> 同意<br><input type="checkbox"/> 作必要修改后同意<br><input type="checkbox"/> 不同意<br><input type="checkbox"/> 终止或暂停已批准的试验<br>备注:                                                                   |                                                               |                                                                        |                                            |   |
| 跟踪审查频率                                                                                                                                        | <input type="checkbox"/> 3 个月<br><input type="checkbox"/> 6 个月<br><input checked="" type="checkbox"/> 12 个月<br><input type="checkbox"/> 不适用                                                                                  |                                                               |                                                                        |                                            |   |
| 批件有效期                                                                                                                                         | 一年                                                                                                                                                                                                                           | 批件失效日期                                                        | 2023 年 3 月 29 日                                                        |                                            |   |
| 主任委员/授权副主任委员签名:  日期: 2022.3.30<br>中南大学湘雅二医院临床研究伦理委员会 (盖章) |                                                                                                                                                                                                                              |                                                               |                                                                        |                                            |   |

## 中南大学湘雅二医院临床研究伦理委员会 伦理审评会签到表

会议时间：2022年3月30日

会议地点：精卫楼19楼机构会议室

| 姓名             | 性别 | 职称           | 工作单位       | 签名                                                                                    |
|----------------|----|--------------|------------|---------------------------------------------------------------------------------------|
| 陈晋东<br>(主任委员)  | 男  | 主任医师<br>教授   | 中南大学湘雅二医院  | 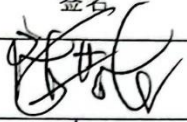   |
| 唐罗生<br>(副主任委员) | 男  | 主任医师<br>教授   | 中南大学湘雅二医院  |    |
| 罗爱静 (委员)       | 女  | 主任医师<br>教授   | 中南大学湘雅二医院  |    |
| 黄江生 (委员)       | 男  | 主任医师<br>教授   | 中南大学湘雅二医院  |    |
| 陶澄 (委员)        | 男  | 主任医师<br>教授   | 中南大学湘雅二医院  |   |
| 李霞 (委员)        | 女  | 主任医师<br>教授   | 中南大学湘雅二医院  |  |
| 吴尚洁 (委员)       | 女  | 主任医师<br>教授   | 中南大学湘雅二医院  |  |
| 张湘瑜 (委员)       | 女  | 主任医师<br>教授   | 中南大学湘雅二医院  |  |
| 张毕奎 (委员)       | 男  | 主任药师<br>教授   | 中南大学湘雅二医院  |  |
| 吴忠仕 (委员)       | 男  | 主任医师<br>教授   | 中南大学湘雅二医院  |  |
| 李卓 (委员)        | 女  | 副主任医师<br>副教授 | 中南大学湘雅二医院  |  |
| 任国峰 (委员)       | 男  | 教授           | 中南大学公共卫生学院 |  |
| 罗冰 (委员)        | 女  | 律师           | 湖南弘湘律师事务所  |  |

保密协议及利益冲突声明：作为中南大学湘雅二医院临床研究伦理委员会成员，我将对我所审阅的临床研究资料（详见审评文件目录）以及临床研究伦理委员会会议讨论的结果和相关内容保密，并保证所审查的项目与本临床研究伦理委员会成员无任何利益冲突。
